# Supplementary material for: Fully Understanding Sex/Gender Disparities in Kidney Care Requires End-to-End, National Data Collection
Source: PubMed Central journal article supplement — Kidney Int Rep. 2024 May 18;9(7):1951–3. doi: 10.1016/j.ekir.2024.05.017 (PMC11284399; doi:10.1016/j.ekir.2024.05.017), 2024-05-18
Supplement: mmc1.pdf [file mmc1.pdf]

## Supplementary references

- S1. Lewandowski, M. J., Krenn, S., Kurnikowski, A., Bretschneider, P., Sattler, M., Schwaiger, E., ... & Hödlmoser, S. (2023). Chronic kidney disease is more prevalent among women but more men than women are under nephrological care: Analysis from six outpatient clinics in Austria 2019. *Wiener klinische Wochenschrift*, 135(3-4), 89-96.
- S2. Hockham, C., Bao, L., Tikou, A., Badve, S. V., Bello, A. K., Jardine, M. J., ... & Jun, M. (2022). Sex differences in chronic kidney disease prevalence in Asia: a systematic review and meta-analysis. *Clinical Kidney Journal*, 15(6), 1144-1151.
- S3. Hill, N. R., Fatoba, S. T., Oke, J. L., Hirst, J. A., O'Callaghan, C. A., Lasserson, D. S., & Hobbs, F. R. (2016). Global prevalence of chronic kidney disease—a systematic review and meta-analysis. *PloS one*, 11(7), e0158765.
- S4. Bello, A., Levin, A., Lunney, M., Osman, M. A., Ye, F., Ashuntantang, G., ... & Harden, P. (2019). Global Kidney Health Atlas: A report by the International Society of Nephrology on the global burden of end-stage kidney disease. Brussels. [www.theisn.org/initiatives/global-kidney-health-atlas/](http://www.theisn.org/initiatives/global-kidney-health-atlas/)
- S5. Neugarten, J., Acharya, A., & Silbiger, S. R. (2000). Effect of gender on the progression of nondiabetic renal disease: a meta-analysis. *Journal of the American Society of Nephrology*, 11(2), 319-329.
- S6. Kucirka, L. M., Grams, M. E., Balhara, K. S., Jaar, B. G., & Segev, D. L. (2012). Disparities in provision of transplant information affect access to kidney transplantation. *American Journal of Transplantation*, 12(2), 351-357.
- S7. Kim S.J., Gill J.S., Knoll G., et al. Referral for kidney transplantation in Canadian provinces. *J Am Soc Nephrol*. 2019;30:1708–1721. doi: 10.1681/ASN.2019020127
- S8. Sawinski, D., Lai, J. C., Pinney, S., Gray, A. L., Jackson, A. M., Stewart, D., ... & Pomfret, E. (2023). Addressing sex-based disparities in solid organ transplantation in the United States—a conference report. *American Journal of Transplantation*, 23(3), 316-325.
- S9. <https://optn.transplant.hrsa.gov/data/view-data-reports/national-data/>
- S10. Jung, Jongbin, Sam Corbett-Davies, Ravi Shroff, and Sharad Goel. "Omitted and included variable bias in tests for disparate impact." *arXiv preprint arXiv:1809.05651* 33 (2018): 39.
- S11. Snyder, J. J., Schaffhausen, C. R., Hart, A., Axelrod, D. A., Dils, D., Formica Jr, R. N., ... & Israni, A. K. (2023). Stakeholders' perspectives on transplant metrics: the 2022 Scientific Registry of Transplant Recipients' consensus conference. *American journal of transplantation*, 23(7), 875-890.
- S12. National Research Council 2022. Realizing the Promise of Equity in the Organ Transplantation System. Washington, DC: The National Academies Press. <https://doi.org/10.17226/26364>.
- S13. Health Services & Resources Administration (HRSA), HRSA directive to expand OPTN data collection, February 7, 2024. <https://optn.transplant.hrsa.gov/news/hrsa-directive-to-expand-optn-data-collection> Accessed May 6, 2024.
